# Supplementary figures and images for: Fibrinolytic Enzyme from The Endophytic Bacillus subtilis InaCC-B1658 Isolated from Papaya (Carica papaya L.) Leaves
Source: Research Square preprint supplement (doi:10.21203/rs.3.rs-5457558/v1), 2024-12-03

**Graphical Abstract**

**
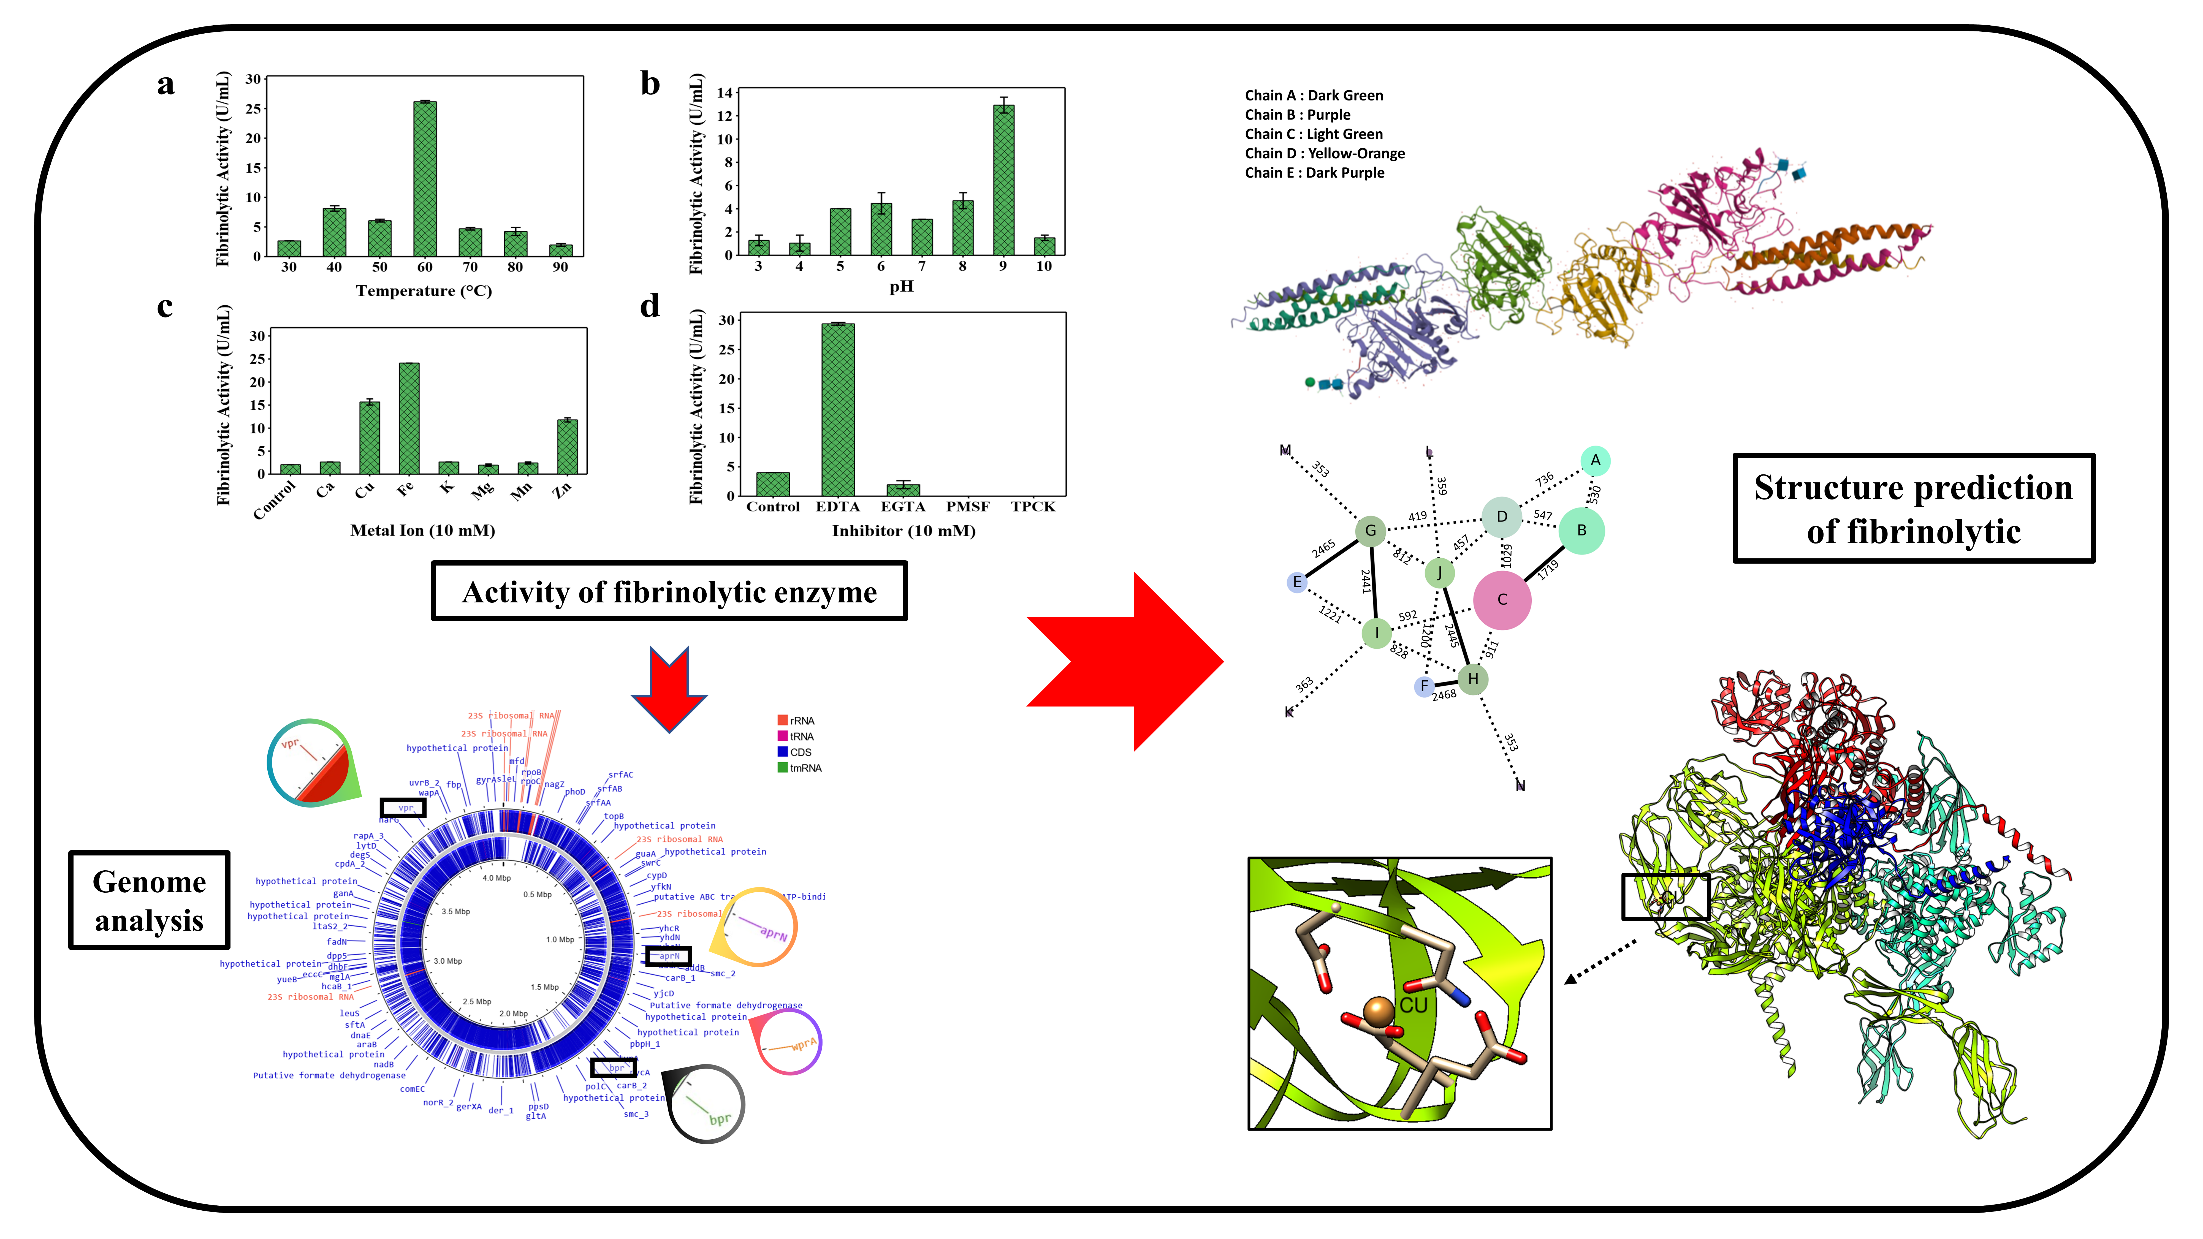
**

Supplement: Supplementary file 1 [file e53ef13fe6a258f4739775f6.docx]
